# Supplementary material
Source: PubMed Central journal article supplement (PMC2922482)

## Supplemental Figure Legends

**Supplemental Figure 1.** Integrin  $\alpha 1$  and  $\alpha 2$  knockdown does not alter PLX4720-induced apoptosis in 3-D collagen. *A*, WM793 cells were transfected with control non-targeting,  $\alpha 1$  integrin (Dharmacon D-008516-01) or  $\alpha 2$  integrin (Dharmacon D-004566-02) siRNAs for 72 hours. Knockdown cells were washed in PBS, blocked in PBS/0.5% BSA for 15 min and incubated with anti-integrin  $\alpha 1$  (FB12) antibody or anti-integrin  $\alpha 2$  (P1E6) antibody for 1 hour at 4°C. Washed cells were then incubated with Alexa Fluor488-conjugated goat anti mouse antibody (Molecular Probes) for 30 min at 4°C. Finally, cells were washed and resuspended in blocking solution with 20% formaldehyde for flow cytometry analysis on the FACSCalibur (Becton Dickinson). *B*, Knockdown cells were analyzed by annexin V-APC staining and flow cytometry analysis, as in the main text.

**Supplemental Figure 2.** Expression of constitutively active Akt3 does not reactivate the ERK1/2 pathway in B-RAF knockdown cells. WM793, WM793 HA-Akt3 or WM793 Myr-HA-Akt3 cells were transfected with either control or B-RAF siRNAs for 72 h. Cells were lysed and analyzed by Western blotting with phosphoS473 Akt, B-RAF, phospho ERK1/2 and actin antibodies.

**A**

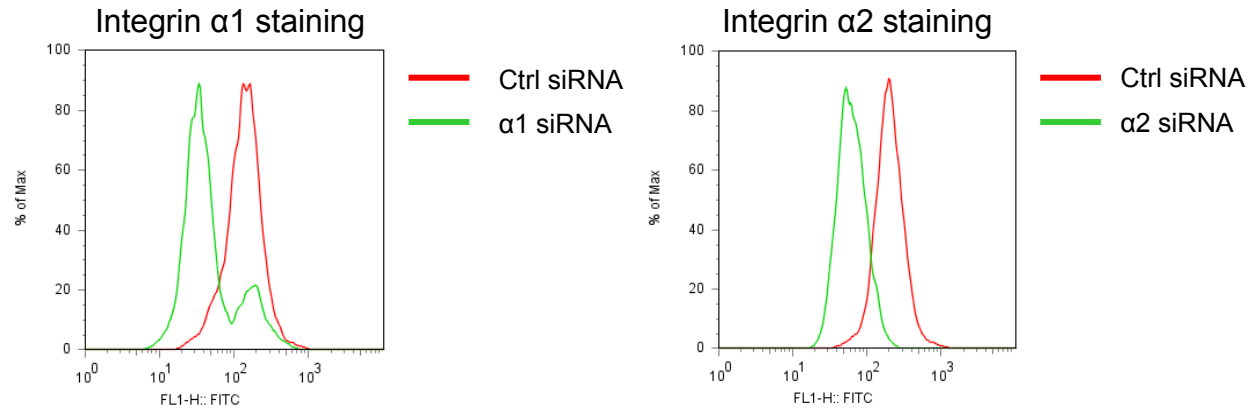

**B**

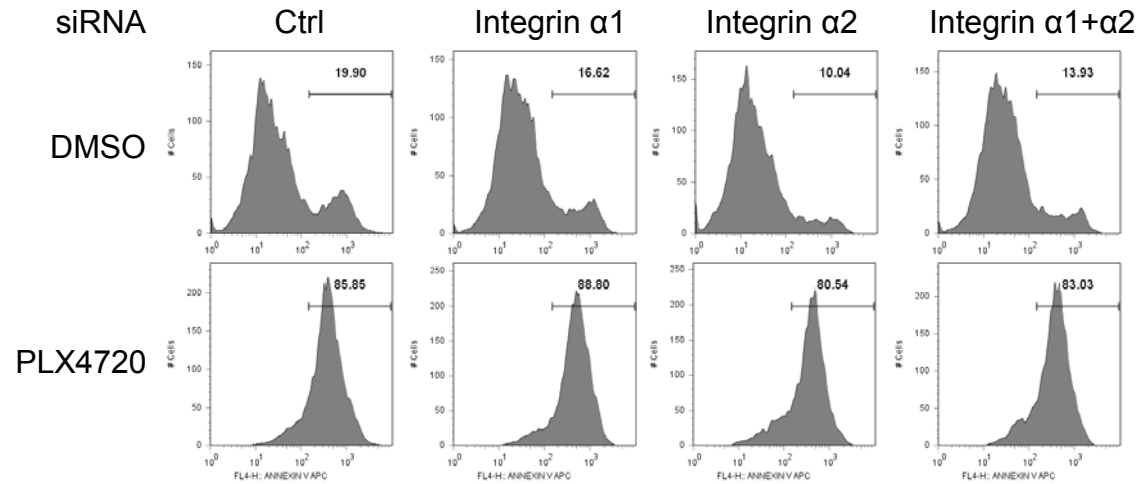

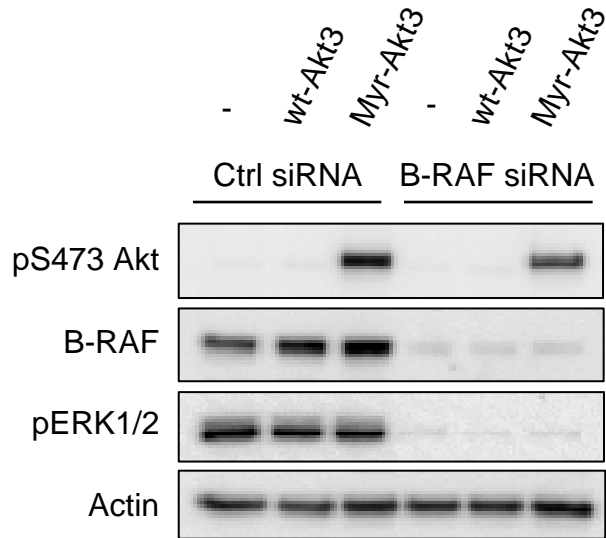

Supplement: NIHMS216482-supplement-9.pdf [file NIHMS216482-supplement-9.pdf]
